# Supplementary material
Source: MDPI journal article supplement (https://www.mdpi.com/2072-4292/7/6/6886)
Supplement: s1 [file s1]

*Supplementary Information***Characterizing the Pixel Footprint of Satellite Albedo Products Derived from MODIS Reflectance in the Heihe River Basin, China. *Remote Sens.* 2015, 7, 6886–6907.**

**Jingjing Peng <sup>1</sup>, Qiang Liu <sup>2,\*</sup>, Lizhao Wang <sup>2</sup>, Qinhuo Liu <sup>1</sup>, Wenjie Fan <sup>3,\*</sup>, Meng Lu <sup>4</sup> and Jianguang Wen <sup>1</sup>**

<sup>1</sup> State Key Laboratory of Remote Sensing Science, Institute of Remote sensing and Digital Earth, Chinese Academy of Sciences, No. 20 Datun Road, Chaoyang District, Beijing 100101, China; E-Mails: rspeggy@163.com (J.P.); liuqh@radi.ac.cn (Q.L.); wenjg@radi.ac.cn (J.W.)

<sup>2</sup> College of Global Change and Earth System Science, Beijing Normal University, No. 19 Xijiekou Road, Haidian District, Beijing 100875, China; E-Mail: wlz1220@sina.com (L.W.)

<sup>3</sup> Institute of Remote Sensing and GIS, Peking University, No. 5 Yiheyuan Road, Haidian District, Beijing 100871, China

<sup>4</sup> Institute for Geoinformatics, Heisenbergstraße 2, D-48149 Münster, Germany; E-Mail: menglu@buffalo.edu

\* Authors to whom correspondence should be addressed; E-Mails: toliuqiang@bnu.edu.cn (Q.L.); fanwj@pku.edu.cn (W.F.); Tel.: +86-10-5880-4501 (Q.L.); +86-10-6275-5085 (W.F.); Fax: +86-10-5880-3002 (Q.L.).

Academic Editors: Richard Müller and Prasad S. Thenkabail

*Received: 17 January 2015 / Accepted: 19 May 2015 / Published: 28 May 2015*

---

**Acknowledgments**

This work was jointly supported by Chinese Natural Science Foundation Project (NO: 91125003, 41331171, 41271368), Open fund of State Key Laboratory of Remote Sensing Science (OFSLRSS201518), National Basic Research Program of China (2013CB733401).

© 2015 by the authors; licensee MDPI, Basel, Switzerland. This article is an open access article distributed under the terms and conditions of the Creative Commons Attribution license (<http://creativecommons.org/licenses/by/4.0/>).
